# Supplementary material for: N6-methyladenosine promotes induction of ADAR1-mediated A-to-I RNA editing to suppress aberrant antiviral innate immune responses
Source: PubMed Central journal article supplement (PMC8320976; doi:10.1371/journal.pbio.3001292), 2021-07-29

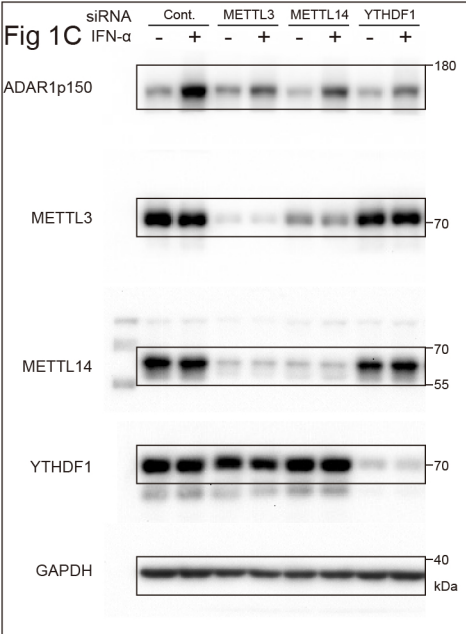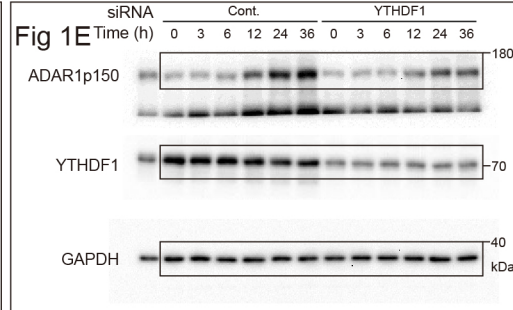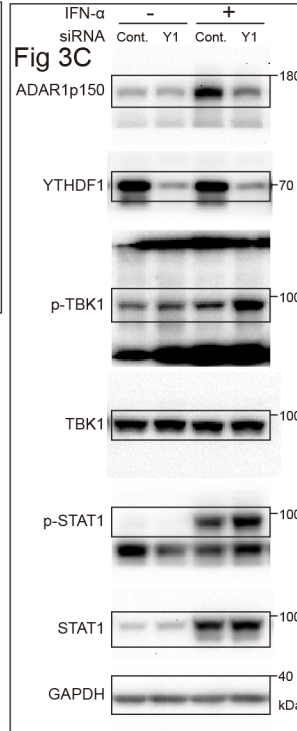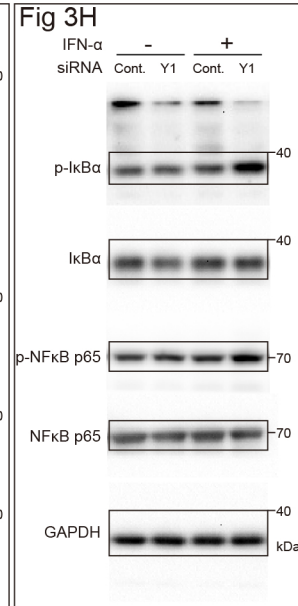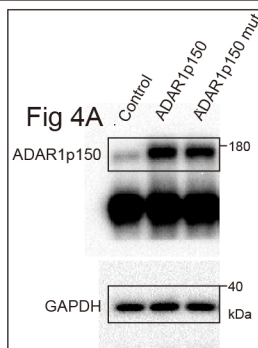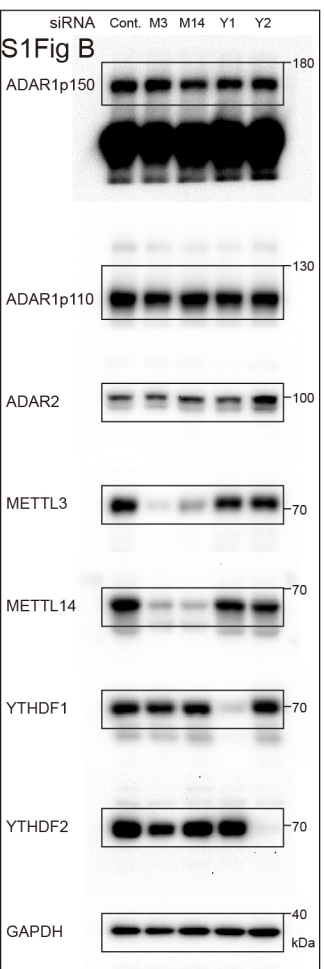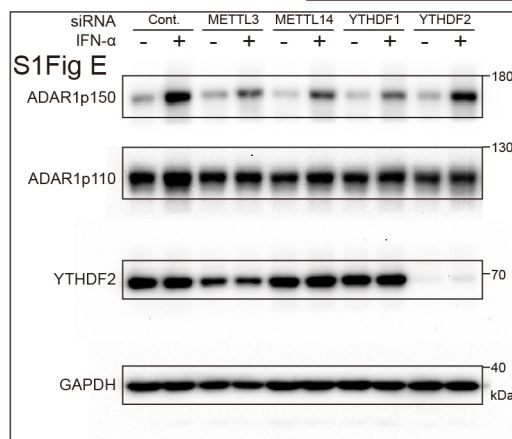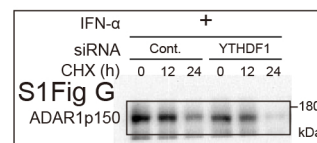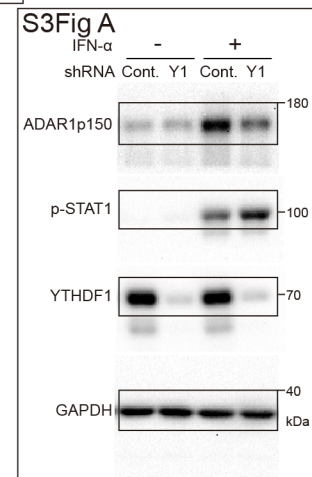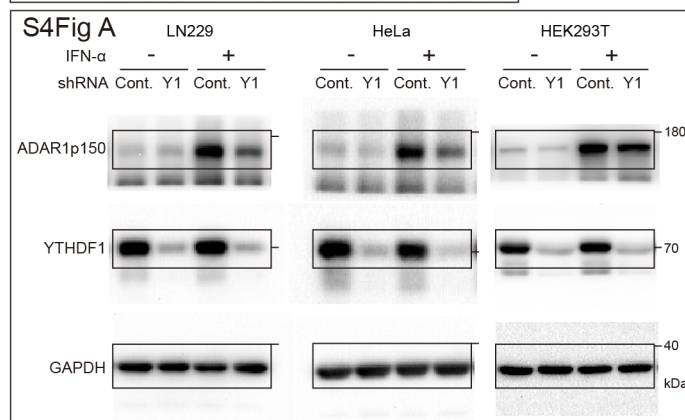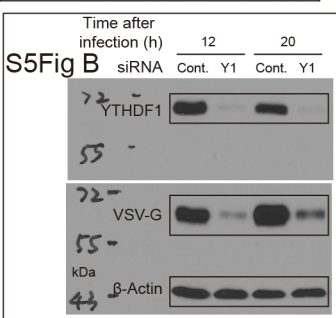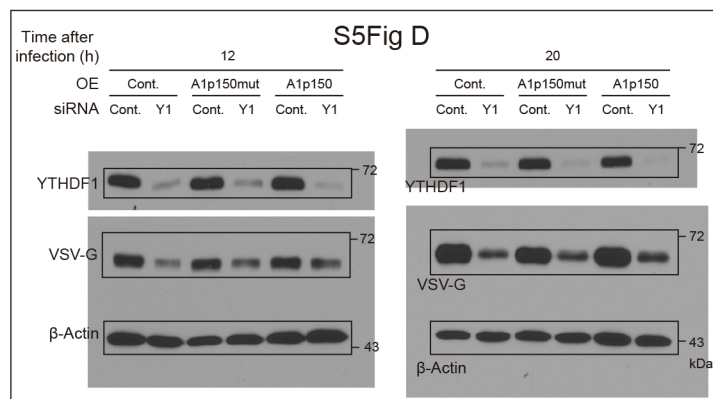

Supplement: pbio.3001292.s011.pdf [file pbio.3001292.s011.pdf]
