# Supplementary material for: N6-methyladenosine promotes induction of ADAR1-mediated A-to-I RNA editing to suppress aberrant antiviral innate immune responses
Source: PLoS Biol. 2021 Jul 29;19(7):e3001292. doi: 10.1371/journal.pbio.3001292 (PMC8320976; doi:10.1371/journal.pbio.3001292)
Supplement: S2 Table — (XLSX) [file pbio.3001292.s008.xlsx]

## Sheet: editing
Position	NCmock1_Coverage.q30	NCmock2_Coverage.q30	NCmock3_Coverage.q30	NCIFN1_Coverage.q30	NCIFN2_Coverage.q30	NCIFN3_Coverage.q30	Y1mock1_Coverage.q30	Y1mock2_Coverage.q30	Y1mock3_Coverage.q30	Y1IFN1_Coverage.q30	Y1IFN2_Coverage.q30	Y1IFN3_Coverage.q30	NCmock1_Frequency	NCmock2_Frequency	NCmock3_Frequency	NCIFN1_Frequency	NCIFN2_Frequency	NCIFN3_Frequency	Y1mock1_Frequency	Y1mock2_Frequency	Y1mock3_Frequency	Y1IFN1_Frequency	Y1IFN2_Frequency	Y1IFN3_Frequency	gene
chr1_108932002	22	13	16	46	27	25	20	31	21	15	25	22	0	0	0	0	0	0.04	0	0.03	0.14	0	0	0	CLCC1
chr1_117088439	21	10	15	25	23	18	12	15	22	16	25	26	0	0	0	0.12	0.13	0.06	0	0	0	0	0.08	0	NA
chr1_120841392	45	38	34	34	36	22	34	31	34	24	33	40	0.16	0.18	0.21	0.15	0.31	0.36	0.15	0.1	0.12	0.21	0.06	0.2	NA
chr1_143419262	27	17	22	12	13	21	17	29	27	18	24	35	0.04	0	0	0	0.08	0	0	0	0	0.06	0	0.09	NA
chr1_143594397	31	21	21	27	27	26	18	16	29	21	32	26	0.06	0.05	0.05	0.07	0.07	0.08	0.06	0.19	0.03	0.05	0	0	NA
chr1_144422147	157	104	93	126	97	87	96	140	120	90	113	102	0.01	0.01	0.02	0.03	0.05	0.02	0.03	0.01	0.02	0.04	0.06	0.06	NBPF15
chr1_145573123	66	53	39	82	47	50	44	46	45	43	55	66	0.15	0.13	0.23	0.37	0.62	0.34	0.23	0.22	0.27	0.44	0.44	0.38	NA
chr1_145573151	34	30	29	42	20	31	37	29	31	27	34	33	0.21	0.2	0.21	0.29	0.35	0.13	0.14	0.34	0.19	0.37	0.15	0.24	NA
chr1_145573169	19	17	19	20	16	13	19	18	22	14	21	13	0.26	0.24	0.53	0.2	0.5	0.15	0.16	0.22	0.18	0.57	0.43	0.54	NA
chr1_146995367	38	25	21	26	20	19	28	18	26	20	26	27	0.29	0.04	0.14	0.12	0.1	0.26	0.11	0	0.08	0.25	0.23	0.15	NBPF12
chr1_146995371	46	30	25	33	23	24	28	21	30	22	41	29	0.52	0.43	0.64	0.58	0.74	0.67	0.61	0.48	0.3	0.68	0.54	0.72	NBPF12
chr1_146995417	188	127	135	165	134	118	135	151	160	112	137	132	0.24	0.17	0.17	0.28	0.35	0.27	0.21	0.17	0.16	0.35	0.31	0.3	NBPF12
chr1_148102797	31	25	18	20	25	14	31	24	24	15	25	12	0.1	0.12	0.17	0.25	0.2	0	0.13	0.08	0.04	0.2	0.24	0.42	NBPF11
chr1_148102827	224	123	113	169	158	145	146	170	154	117	144	127	0.21	0.2	0.2	0.4	0.44	0.38	0.26	0.22	0.29	0.37	0.4	0.39	NBPF11
chr1_148102851	65	51	48	60	58	49	49	53	53	45	48	50	0.02	0	0.02	0.07	0.1	0.02	0.02	0	0.02	0.04	0.04	0.06	NBPF11
chr1_148102855	39	34	34	37	32	33	29	31	29	34	31	27	0.18	0.26	0.24	0.27	0.38	0.21	0.28	0.26	0.21	0.26	0.1	0.15	NBPF11
chr1_148102870	28	25	29	20	14	18	18	23	18	27	13	13	0.07	0.12	0.17	0.2	0.14	0.22	0.06	0.09	0.11	0.19	0.15	0.08	NBPF11
chr1_148532133	29	28	19	37	28	15	36	26	36	28	33	18	0.07	0.11	0.16	0.27	0.18	0.2	0.08	0.04	0.11	0.25	0.33	0.39	NBPF14
chr1_148532142	167	101	99	149	125	114	114	147	137	97	123	119	0.04	0.03	0.02	0.05	0.09	0.1	0.02	0.05	0.04	0.15	0.07	0.08	NBPF14
chr1_148532163	196	125	123	185	156	144	134	174	158	109	142	143	0.28	0.17	0.26	0.41	0.44	0.4	0.27	0.22	0.23	0.39	0.43	0.36	NBPF14
chr1_148532191	43	37	36	33	26	32	25	34	30	29	27	31	0.23	0.27	0.19	0.3	0.35	0.12	0.12	0.21	0.17	0.34	0.11	0.23	NBPF14
chr1_149054790	35	26	29	34	26	21	25	39	23	27	26	30	0.14	0.04	0.03	0.06	0.08	0.14	0.04	0.15	0.04	0.07	0.08	0	NBPF9
chr1_149054792	40	29	32	32	29	20	28	43	28	30	29	33	0.03	0	0	0.09	0	0	0.04	0.02	0.04	0.07	0.1	0.03	NBPF9
chr1_149054794	41	37	34	34	31	23	28	45	29	27	30	37	0.02	0.08	0.03	0	0.06	0.09	0	0	0.03	0	0	0	NBPF9
chr1_155881829	15	13	17	14	15	13	21	25	21	15	13	14	0	0	0.18	0.07	0.07	0.08	0.1	0.12	0.14	0	0	0.07	SYT11
chr1_155881846	54	36	42	37	29	30	58	70	46	50	34	49	0.09	0.06	0.05	0.11	0.03	0.1	0.09	0.06	0.13	0.08	0.03	0.08	SYT11
chr1_155881854	50	29	34	28	21	25	43	57	37	41	24	44	0.02	0	0.03	0.14	0	0.08	0	0.05	0	0.1	0.04	0.02	SYT11
chr1_155881855	47	28	33	30	18	25	44	58	35	40	25	44	0.04	0	0.03	0.1	0	0.08	0	0	0	0.07	0.04	0	SYT11
chr1_155881913	41	40	45	39	19	14	62	59	54	35	40	30	0	0	0.04	0	0.16	0.07	0.06	0.02	0	0	0	0	SYT11
chr1_155883428	44	26	25	44	26	30	48	60	48	24	38	24	0.09	0.15	0.08	0.34	0.15	0.17	0.02	0.13	0.06	0.25	0.13	0.12	SYT11
chr1_155883437	24	14	13	19	18	10	28	21	21	11	13	11	0	0	0	0.21	0	0.1	0	0	0	0.09	0.08	0.09	SYT11
chr1_156211979	47	48	52	53	48	60	60	44	72	41	66	90	0.7	0.73	0.77	0.68	0.62	0.67	0.67	0.75	0.67	0.54	0.82	0.69	SLC25A44
chr1_160332454	32	35	31	27	34	23	61	41	44	26	33	27	0.03	0.03	0.1	0.04	0.06	0.04	0.08	0.05	0.02	0.12	0	0.07	COPA
chr1_16562863	54	34	29	44	45	34	43	44	37	28	37	27	0.09	0.03	0	0.09	0.04	0.09	0	0.07	0	0.11	0.14	0.04	NBPF1
chr1_16562864	54	31	30	45	41	37	43	40	37	29	36	26	0	0.03	0.1	0.02	0	0.05	0	0	0.08	0.1	0.06	0.04	NBPF1
chr1_16563071	30	30	25	25	24	22	29	33	37	29	21	20	0.07	0.07	0.24	0.32	0.17	0.18	0.1	0.09	0.11	0.28	0.24	0.4	NBPF1
chr1_16563077	154	94	100	125	103	88	102	122	110	99	117	90	0.01	0.02	0.01	0.05	0.03	0.02	0.03	0	0.02	0.04	0.05	0.07	NBPF1
chr1_16563080	167	102	104	144	115	102	110	131	121	110	130	112	0.06	0.05	0.03	0.06	0.11	0.1	0.01	0.04	0.02	0.13	0.08	0.07	NBPF1
chr1_16563101	197	119	129	185	152	138	132	160	141	127	156	137	0.26	0.22	0.19	0.45	0.46	0.33	0.26	0.2	0.21	0.43	0.4	0.38	NBPF1
chr1_16563125	63	49	53	54	46	53	42	46	52	48	46	61	0.03	0	0.02	0.06	0.11	0.04	0.02	0.02	0	0.06	0	0.05	NBPF1
chr1_16563129	44	32	31	34	22	36	26	33	26	33	29	36	0.14	0.19	0.29	0.24	0.45	0.22	0.19	0.36	0.19	0.42	0.04	0.17	NBPF1
chr1_16563138	26	18	16	18	14	21	18	21	20	23	16	21	0.08	0.11	0.06	0	0	0.05	0.06	0	0	0	0	0	NBPF1
chr1_16563192	20	14	16	10	10	26	16	15	10	11	13	13	0.1	0	0.06	0.2	0	0.12	0	0.07	0.2	0.09	0.08	0	NBPF1
chr1_179074869	68	59	52	51	49	27	53	42	57	32	37	27	0	0.05	0.04	0.04	0.08	0.07	0.02	0	0.02	0	0.03	0.07	FAM20B
chr1_179357143	28	12	18	22	20	15	13	20	14	12	11	12	0.36	0.17	0.28	0.68	0.5	0.73	0.38	0.05	0.43	0.25	0.64	0.67	SOAT1
chr1_184792054	53	69	53	44	39	36	60	60	45	37	37	57	0.26	0.1	0.17	0.11	0.08	0.14	0.25	0.15	0.29	0.22	0.16	0.11	FAM129A
chr1_184792095	84	73	66	70	50	47	77	102	69	47	39	60	0.01	0.04	0.03	0.03	0.06	0.06	0.04	0.02	0.04	0	0.05	0.02	FAM129A
chr1_184793338	16	20	15	11	20	13	19	25	21	10	17	10	0	0	0	0.18	0	0	0.05	0	0.05	0.2	0	0	FAM129A
chr1_184793456	32	20	23	22	15	17	31	40	33	14	16	15	0.03	0.15	0	0	0	0.24	0.06	0.07	0.03	0.14	0.12	0.13	FAM129A
chr1_20652098	26	20	16	25	24	19	25	18	23	19	24	26	0.08	0	0	0.08	0.08	0	0.04	0	0.09	0	0.04	0	DDOST
chr1_212816294	26	11	19	17	18	21	17	34	29	22	31	26	0	0	0	0.06	0	0	0.12	0.03	0	0.05	0.03	0	TATDN3
chr1_214349358	57	45	66	33	20	25	47	34	54	16	19	21	0	0	0.02	0.12	0.05	0.12	0.02	0	0	0	0.05	0	PTPN14
chr1_214350835	43	22	23	34	28	21	25	34	29	15	12	10	0.05	0.05	0	0.09	0.11	0.05	0.08	0.03	0.03	0	0.08	0	PTPN14
chr1_214350857	47	21	28	33	28	22	23	37	34	15	14	13	0.04	0	0.11	0.06	0	0.05	0	0.03	0	0	0	0	PTPN14
chr1_214350975	69	82	44	39	37	20	73	49	64	26	31	13	0.06	0.05	0.07	0.05	0.05	0.05	0.01	0.06	0.05	0.08	0.03	0.08	PTPN14
chr1_214355823	50	50	54	26	29	16	44	64	54	20	28	35	0.14	0.04	0.02	0.04	0.03	0.44	0.05	0.02	0.04	0	0	0.17	PTPN14
chr1_214355827	46	47	48	24	27	15	37	55	52	20	24	34	0.2	0.23	0.33	0.33	0.48	0.67	0.35	0.29	0.33	0.55	0.42	0.47	PTPN14
chr1_214355875	74	75	52	56	47	52	49	67	69	31	31	48	0.03	0.03	0	0.05	0.19	0.13	0.02	0.01	0.12	0.06	0	0.12	PTPN14
chr1_214356289	45	45	28	25	20	31	37	36	28	15	12	12	0.02	0.02	0	0	0.1	0.13	0	0	0	0	0	0	PTPN14
chr1_225786942	25	17	16	12	18	23	31	33	18	11	25	47	0.04	0.06	0	0	0.06	0.09	0	0	0.06	0	0.08	0.06	SRP9
chr1_225786943	24	17	18	12	18	24	32	33	18	10	24	47	0.17	0.12	0.06	0	0.06	0.17	0.09	0.03	0.22	0.3	0.08	0.09	SRP9
chr1_225786972	30	17	27	15	23	22	23	39	26	24	34	52	0.07	0.12	0.07	0.13	0.17	0	0.09	0.18	0.15	0.08	0.15	0.08	SRP9
chr1_225983639	26	30	29	23	30	23	42	33	51	29	60	36	0	0	0.03	0.09	0.2	0.04	0.02	0	0	0.07	0.07	0.08	SDE2
chr1_35602076	32	17	23	30	22	12	18	24	22	13	24	24	0.12	0.12	0.22	0.7	0.59	0.58	0.06	0.08	0.23	0.31	0.58	0.25	PSMB2
chr1_35602626	54	30	28	39	25	18	35	38	23	16	19	26	0.07	0.13	0.11	0.26	0.12	0.17	0.14	0.05	0	0.06	0.21	0.19	PSMB2
chr1_35602630	53	31	28	37	26	19	35	35	22	16	19	26	0.6	0.52	0.46	0.84	0.81	0.79	0.29	0.63	0.5	0.62	0.74	0.88	PSMB2
chr1_35602636	51	29	28	38	25	18	35	37	22	16	17	25	0.39	0.17	0.43	0.58	0.32	0.33	0.26	0.22	0.14	0.38	0.41	0.44	PSMB2
chr1_45613182	159	127	114	166	137	175	68	66	69	96	132	107	0.04	0.08	0.08	0.01	0.02	0.06	0.15	0.08	0.06	0.03	0.03	0.05	NASP
chr1_88983134	13	15	29	24	26	19	19	17	17	23	19	17	0.77	0.93	0.97	0.79	0.81	0.74	0.89	0.62	0.76	0.65	0.84	0.41	RBMXL1
chr10_100232885	21	31	24	22	31	17	25	14	19	25	25	21	0.1	0	0	0	0.03	0.06	0	0	0	0.24	0.12	0.05	CWF19L1
chr10_15106358	44	15	15	16	18	25	32	24	26	32	21	24	0	0.07	0	0.06	0.06	0.12	0	0	0	0	0	0	NMT2
chr10_52445459	28	22	19	34	28	24	20	22	12	22	10	38	0	0	0	0.03	0.14	0	0	0	0	0.14	0	0.11	NA
chr10_52445463	27	22	18	31	26	25	20	21	12	23	10	37	0	0	0	0.03	0.08	0.04	0	0.1	0	0	0	0.03	NA
chr10_52450298	36	41	42	80	57	39	24	26	24	46	52	38	0	0.02	0.05	0.07	0	0.08	0	0	0.04	0.04	0.04	0	NA
chr10_52450300	34	38	40	83	57	39	23	27	23	41	50	39	0.06	0	0.05	0.07	0.02	0	0.04	0	0.09	0.12	0.04	0	NA
chr10_73248973	19	15	18	15	14	11	25	16	22	19	10	17	0.16	0.13	0.06	0.07	0.36	0.36	0.12	0.06	0.09	0.16	0.2	0.24	MRPS16
chr10_73249034	42	36	41	39	26	27	52	45	33	33	36	40	0	0	0.02	0.05	0.08	0.07	0	0.11	0	0	0.03	0	MRPS16
chr10_73249039	50	48	44	43	33	27	54	54	40	34	41	45	0.02	0.02	0	0.07	0.03	0.07	0	0.09	0.05	0.09	0.05	0	MRPS16
chr10_73249057	62	59	51	48	38	28	59	62	45	34	50	61	0.16	0.05	0.06	0.31	0.24	0.25	0.07	0.1	0.13	0.15	0.12	0.15	MRPS16
chr10_73249059	59	57	48	47	37	27	55	62	44	34	47	60	0.32	0.09	0.1	0.4	0.24	0.3	0.13	0.11	0.18	0.15	0.21	0.18	MRPS16
chr10_73249083	43	40	33	31	26	20	30	49	35	22	30	40	0	0	0.03	0.03	0	0.05	0	0.04	0	0.18	0	0	MRPS16
chr10_73249087	24	20	16	18	11	10	11	23	14	14	14	23	0	0	0	0	0	0	0	0	0.14	0.07	0	0.09	MRPS16
chr10_73249115	34	14	27	28	20	19	25	28	32	24	26	28	0.06	0	0.07	0.11	0.2	0.05	0	0	0	0.12	0.04	0	MRPS16
chr10_73249118	34	15	26	27	21	21	24	29	34	25	27	30	0.35	0.2	0.15	0.48	0.48	0.29	0.54	0.24	0.12	0.48	0.56	0.37	MRPS16
chr10_73249122	34	16	28	29	28	23	27	30	34	26	27	32	0.06	0.06	0.04	0.1	0.07	0.04	0.04	0	0	0.08	0.04	0	MRPS16
chr10_73249907	52	24	26	47	14	18	48	31	39	19	37	26	0.04	0.08	0	0.06	0.14	0	0.04	0.03	0.08	0.05	0.24	0.04	MRPS16
chr10_73249962	48	31	26	32	10	23	34	50	36	13	31	20	0	0	0.08	0.28	0	0.13	0.12	0.02	0	0	0.06	0.2	MRPS16
chr10_73249963	44	30	27	31	10	23	35	50	35	13	31	20	0	0.03	0.07	0.29	0.1	0.13	0.09	0.02	0	0.08	0.06	0.2	MRPS16
chr10_73250084	28	23	23	24	19	10	29	40	27	13	21	35	0.5	0.35	0.57	0.58	0.58	0.5	0.28	0.5	0.44	0.38	0.33	0.63	MRPS16
chr10_73250086	28	23	23	25	19	10	29	42	26	13	21	35	0.18	0.09	0.17	0.28	0.16	0.6	0.14	0.17	0.19	0.31	0.19	0.09	MRPS16
chr11_125656230	42	27	23	28	21	24	18	28	19	33	31	26	0.02	0	0.04	0.18	0.05	0	0.06	0	0	0.12	0.06	0.08	CHEK1
chr11_125656244	42	27	22	29	22	24	18	34	19	34	38	28	0.05	0	0.14	0.17	0	0	0.06	0.03	0	0.15	0.11	0.07	CHEK1
chr11_12941258	29	41	32	32	37	40	40	28	36	37	32	29	0.14	0	0	0.03	0.05	0.28	0.05	0.04	0.06	0.03	0.03	0.07	TEAD1
chr11_16756918	14	10	13	22	16	15	24	27	18	23	25	15	0	0.2	0	0	0.31	0.13	0	0	0.06	0	0.04	0.07	C11orf58
chr11_16756919	14	10	13	22	17	17	24	27	19	23	26	17	0.07	0.1	0.08	0.05	0.06	0	0.08	0	0	0.04	0.04	0.06	C11orf58
chr11_16756920	14	10	13	23	17	17	24	27	20	21	27	17	0.07	0.2	0.15	0	0	0	0.17	0.11	0.05	0.05	0.07	0.18	C11orf58
chr11_16756921	14	10	13	22	15	17	24	28	20	23	27	18	0	0	0.15	0.05	0	0.06	0.04	0	0	0.04	0.07	0	C11orf58
chr11_16756922	15	10	13	23	17	17	24	27	21	23	27	18	0.07	0	0	0	0.06	0.06	0	0.07	0	0.04	0	0.22	C11orf58
chr11_16756923	15	10	13	22	17	17	25	28	20	23	27	18	0.07	0	0	0.18	0.18	0.06	0	0	0.1	0	0.04	0	C11orf58
chr11_16756924	15	10	13	24	17	17	25	30	22	24	27	18	0	0	0.23	0	0.24	0.06	0	0.03	0	0	0.15	0.06	C11orf58
chr11_16756942	15	10	13	24	17	18	26	31	23	24	27	18	0	0	0.08	0	0.29	0	0.04	0.03	0.09	0.08	0.11	0.06	C11orf58
chr11_61849974	21	11	15	26	26	27	15	23	26	31	34	25	0.52	0.55	0.4	0.65	0.62	0.7	0.6	0.74	0.58	0.61	0.65	0.52	NA
chr11_61849977	19	11	15	26	26	27	14	24	24	32	33	25	0.32	0.36	0.27	0.46	0.46	0.44	0.29	0.42	0.38	0.47	0.48	0.2	NA
chr11_62739477	15	13	19	15	12	13	18	27	17	16	24	15	0	0.15	0	0	0	0	0	0.04	0	0	0.04	0	NA
chr11_65429495	19	16	20	23	14	17	35	66	51	64	48	67	0.05	0.12	0.05	0.04	0	0	0.09	0.11	0.04	0.02	0	0.03	NEAT1
chr11_769349	38	21	29	23	38	27	23	33	28	30	37	26	0.05	0.1	0.03	0.13	0.11	0.11	0.04	0	0	0.03	0.08	0.15	PDDC1
chr11_93734902	29	15	20	27	16	21	20	41	13	19	23	18	0.07	0	0.05	0.15	0.12	0.05	0	0.07	0	0.05	0.09	0.06	NA
chr12_113390121	17	14	22	11	17	21	35	27	24	25	14	22	0.06	0.21	0.09	0.55	0.53	0.29	0.17	0.22	0.12	0.24	0.29	0.27	NA
chr12_113390123	18	15	23	13	20	22	35	29	25	27	13	26	0	0.07	0.09	0.15	0	0.14	0	0	0.04	0.07	0.15	0.19	NA
chr12_113390128	18	17	24	14	19	25	38	32	28	29	17	31	0.06	0.24	0.12	0.29	0.16	0.24	0.29	0.16	0.21	0.52	0.35	0.29	NA
chr12_113390142	26	25	41	31	30	34	51	39	32	44	30	45	0.23	0.24	0.2	0.19	0.27	0.12	0.2	0.03	0.16	0.11	0.13	0.31	NA
chr12_113391109	20	13	23	22	10	10	31	20	21	14	20	12	0	0	0	0	0	0.1	0	0	0.1	0.14	0.15	0.08	NA
chr12_116714631	25	27	23	15	12	12	32	33	36	13	19	11	0.08	0.07	0.13	0.07	0.17	0.17	0	0.06	0.06	0.15	0.05	0	C12orf49
chr12_120461358	17	13	33	16	24	25	31	35	21	14	18	20	0	0	0	0	0.04	0.2	0	0.03	0	0	0.17	0.05	GATC
chr12_120461365	18	15	33	20	24	28	34	35	25	14	21	20	0	0	0.03	0.1	0.17	0.14	0.06	0.11	0.12	0.21	0.05	0	GATC
chr12_122769132	251	143	202	230	179	185	231	293	217	155	192	200	0.04	0.01	0.02	0.03	0.07	0.08	0.01	0.02	0.01	0.03	0.07	0.07	DENR
chr12_132721535	23	15	14	12	13	11	11	22	16	12	34	23	0.48	0.4	0.21	0.58	0.77	0.73	0.18	0.27	0.5	0.5	0.79	0.61	PGAM5
chr12_132721539	27	13	16	15	16	14	12	20	17	13	37	26	0	0	0	0.07	0.12	0.07	0	0	0.06	0.23	0	0	PGAM5
chr12_132721546	25	14	18	16	15	15	12	20	16	13	40	27	0	0.14	0	0.06	0.2	0.07	0	0	0	0	0.03	0	PGAM5
chr12_132721706	31	23	26	29	13	15	29	23	14	16	30	27	0.03	0.09	0.04	0.14	0.15	0.07	0	0	0.07	0.06	0.1	0.07	PGAM5
chr12_132721717	31	23	26	27	14	14	28	23	12	16	29	27	0	0	0	0.15	0.07	0.07	0.04	0	0	0.06	0	0	PGAM5
chr12_56239764	16	23	17	18	17	17	36	34	29	20	17	20	0.12	0	0	0	0	0.06	0.03	0.09	0.03	0.05	0.24	0.05	ANKRD52
chr12_68843262	32	23	13	16	24	21	20	21	26	23	23	32	0.16	0	0	0.12	0.08	0.05	0.05	0.1	0.12	0.09	0.04	0.09	MDM2
chr12_68843263	34	20	14	17	24	21	21	22	26	24	23	31	0.47	0.35	0.36	0.59	0.62	0.62	0.52	0.41	0.58	0.67	0.61	0.68	MDM2
chr12_68843267	40	21	15	20	29	24	22	26	29	24	32	34	0.03	0.05	0.07	0.05	0	0	0	0	0.03	0	0.03	0.09	MDM2
chr12_68843273	123	59	62	79	70	82	66	91	72	80	104	101	0.11	0.02	0.13	0.24	0.2	0.13	0.09	0.12	0.07	0.21	0.17	0.13	MDM2
chr12_68843276	121	61	59	86	71	86	67	98	73	82	105	104	0.1	0.1	0.1	0.19	0.24	0.07	0.13	0.12	0.12	0.12	0.18	0.13	MDM2
chr12_68843277	118	61	58	87	71	84	68	95	69	79	103	104	0.02	0.07	0.09	0.06	0.06	0.08	0.07	0.03	0.12	0.04	0.07	0.09	MDM2
chr12_68843293	123	61	65	90	74	85	69	101	75	88	110	107	0.15	0.07	0.14	0.17	0.19	0.19	0.07	0.04	0.07	0.12	0.12	0.19	MDM2
chr12_68843297	126	61	65	90	72	83	66	104	74	87	107	101	0.02	0.02	0.02	0.07	0.03	0.02	0.03	0.02	0.01	0.1	0.08	0.04	MDM2
chr12_68843726	32	13	16	38	21	19	27	31	26	38	31	21	0.06	0.08	0.06	0.03	0.1	0	0.04	0	0	0.08	0.03	0	MDM2
chr12_68843727	32	13	16	37	21	19	27	30	26	37	30	21	0	0.08	0.12	0.03	0.05	0.05	0.07	0	0.04	0.22	0.03	0.1	MDM2
chr12_68843729	31	13	14	37	21	17	27	30	25	35	25	19	0.29	0.08	0.21	0.27	0.33	0.24	0.07	0.2	0.12	0.37	0.28	0.26	MDM2
chr12_68843730	33	13	14	36	20	16	26	28	24	35	26	19	0.03	0.15	0.14	0.06	0.15	0.06	0.04	0.04	0.04	0.03	0	0.05	MDM2
chr12_68843772	21	18	24	17	12	17	27	18	12	27	20	17	0	0	0	0.06	0	0	0.11	0	0	0.15	0	0	MDM2
chr12_68843778	19	17	24	17	14	17	26	19	12	28	21	17	0.05	0.18	0	0.12	0.21	0	0.08	0.05	0	0.11	0.05	0.06	MDM2
chr12_98549000	86	42	64	75	72	59	29	38	39	25	49	35	0	0	0.03	0.13	0.03	0.05	0	0	0	0.08	0	0	TMPO
chr12_98549027	39	25	33	37	40	28	12	23	14	10	24	16	0.08	0.04	0	0.16	0.23	0.21	0.08	0.09	0	0.3	0.21	0.12	TMPO
chr12_98549423	39	18	24	53	18	21	15	23	26	11	13	13	0.03	0.06	0.04	0.23	0.22	0.14	0	0	0.04	0.09	0.08	0.15	TMPO
chr12_98549424	40	19	26	53	16	23	16	22	26	11	12	12	0	0	0	0.06	0.12	0.09	0.12	0.05	0	0.09	0	0.08	TMPO
chr12_98549436	47	26	41	61	28	37	25	29	30	16	27	17	0	0	0	0.03	0.11	0.08	0	0	0	0.06	0	0.06	TMPO
chr13_110897198	34	17	21	36	34	27	30	39	36	27	30	34	0.06	0	0.14	0.06	0.03	0.04	0.07	0.1	0	0.15	0.1	0.12	NA
chr13_110897374	70	39	56	113	55	54	89	93	78	81	112	108	0	0	0	0.05	0.11	0.09	0.06	0.06	0.08	0.09	0.13	0.08	NA
chr13_110897383	75	42	64	120	63	62	96	96	88	91	126	127	0.69	0.69	0.72	0.89	0.86	0.85	0.69	0.85	0.86	0.87	0.84	0.84	NA
chr13_110897396	68	42	63	122	64	64	99	103	89	99	124	127	0.01	0.02	0.03	0.07	0.03	0.06	0.02	0.02	0.02	0.03	0.04	0.02	NA
chr13_110898665	13	14	20	19	16	10	18	26	27	32	27	24	0	0	0	0	0	0	0	0	0	0.03	0	0.12	NA
chr13_110898687	28	19	25	39	27	28	31	45	37	58	63	50	0	0	0	0.08	0.15	0.07	0.16	0.07	0	0.05	0.02	0.16	NA
chr13_110899955	39	27	39	57	36	38	47	57	34	54	71	46	0.05	0	0.08	0.04	0.08	0.08	0.13	0.14	0.06	0.13	0.18	0.09	NA
chr13_110899961	60	43	50	74	44	49	66	85	46	65	90	56	0.03	0.05	0.02	0.15	0.18	0.18	0.05	0.06	0.07	0.25	0.28	0.07	NA
chr13_110899967	69	47	58	82	47	52	69	90	55	72	99	60	0	0.02	0.02	0.07	0.13	0.08	0.01	0.06	0.02	0.12	0.17	0.03	NA
chr13_110899994	47	37	43	43	28	36	43	66	32	40	58	32	0.57	0.38	0.6	0.58	0.68	0.69	0.67	0.77	0.62	0.55	0.62	0.44	NA
chr13_110899995	47	37	42	40	28	36	43	65	32	39	57	32	0	0.03	0.02	0.07	0.07	0.06	0.02	0.08	0.09	0.13	0.07	0.06	NA
chr13_21374969	28	22	20	11	19	13	32	27	28	11	14	15	0	0	0.05	0.09	0	0.23	0.03	0.04	0	0.09	0.14	0	ZDHHC20
chr13_21374971	30	24	19	13	19	14	31	26	29	11	15	15	0.07	0.12	0.16	0.38	0.37	0.43	0.06	0.19	0.1	0.09	0.2	0.13	ZDHHC20
chr13_52029665	30	24	29	40	33	27	25	31	28	24	27	43	0.07	0	0.07	0	0.03	0.07	0	0	0	0	0.11	0.09	UTP14C
chr13_82300524	21	11	11	26	15	14	13	24	12	12	16	18	0.05	0	0	0.08	0	0	0	0.08	0	0	0.19	0.17	NA
chr13_82300527	21	10	11	26	16	15	13	27	13	11	17	18	0.29	0	0.18	0.23	0.38	0.13	0.08	0.15	0	0.27	0.35	0.28	NA
chr14_103590808	28	19	25	29	10	12	21	20	21	10	20	17	0	0	0	0.07	0.1	0	0	0	0	0	0	0	APOPT1
chr14_103590815	28	19	25	29	10	12	20	20	20	10	20	17	0	0	0	0.07	0.1	0	0	0.05	0	0	0	0	APOPT1
chr14_22972819	14	14	10	10	12	13	26	26	14	15	28	19	0.14	0.21	0.1	0.4	0.17	0.38	0	0.08	0.07	0.13	0.14	0.16	AJUBA
chr14_32268505	30	23	32	27	22	19	27	23	38	12	22	14	0.03	0	0.03	0.07	0.09	0.05	0.07	0	0.05	0	0.09	0.07	NA
chr14_32268508	27	28	35	28	23	19	28	26	39	13	22	15	0.07	0.04	0.06	0.14	0.22	0.26	0.18	0.04	0.08	0.08	0.05	0.07	NA
chr14_32268509	29	29	36	28	23	19	28	25	41	13	22	15	0.03	0.03	0.03	0.11	0.04	0.11	0	0.04	0	0.08	0.09	0	NA
chr14_32268540	23	24	29	26	17	19	23	17	27	10	17	13	0.09	0.04	0.07	0.27	0	0.21	0.04	0.06	0.07	0	0.29	0.15	NA
chr15_42532359	20	14	34	21	22	35	25	32	20	20	28	24	0	0	0	0.1	0	0.03	0	0	0	0.05	0.07	0.08	SNAP23
chr15_42567144	45	24	37	18	14	18	26	26	21	14	12	21	0.27	0.12	0.14	0.22	0.43	0.28	0.15	0.15	0.24	0.14	0.08	0.1	HAUS2
chr15_42567145	45	23	36	20	14	18	26	26	21	14	12	21	0.16	0.09	0.19	0.1	0.21	0.22	0.04	0.08	0.19	0.29	0	0.19	HAUS2
chr15_42567150	42	24	36	19	14	18	26	26	21	13	11	21	0	0	0	0	0	0	0	0	0	0	0.18	0	HAUS2
chr15_42567151	42	21	35	19	14	18	25	26	20	14	12	21	0.07	0	0.11	0.05	0.07	0.11	0	0	0.05	0.14	0.08	0.1	HAUS2
chr15_49126927	33	38	47	45	18	31	55	47	39	22	36	33	0.06	0.05	0.04	0.38	0.44	0.23	0.04	0.06	0.1	0.36	0.33	0.39	COPS2
chr16_14668599	15	13	14	16	13	10	25	23	15	11	12	13	0	0.08	0	0	0	0.3	0	0	0	0	0.08	0	BFAR
chr16_15700252	33	22	23	32	17	20	24	27	24	14	20	13	0.03	0	0.04	0.12	0.18	0.2	0.04	0	0.04	0	0.05	0.08	NA
chr16_28955176	22	14	14	43	27	22	14	16	14	17	19	32	0.09	0	0.14	0.09	0.15	0.23	0.07	0.06	0	0.12	0.21	0.03	NA
chr16_29442265	34	13	23	18	18	14	13	29	20	14	10	11	0.47	0.15	0.26	0.22	0.61	0.21	0.15	0.28	0.3	0.29	0.4	0.45	NA
chr16_29442266	34	11	24	18	18	14	14	29	20	14	10	10	0.38	0	0.12	0.33	0.56	0.36	0.29	0.21	0.35	0.43	0.4	0.4	NA
chr16_30284035	34	11	24	17	18	14	13	29	20	14	10	10	0.38	0	0.12	0.35	0.56	0.36	0.31	0.21	0.35	0.43	0.4	0.4	NA
chr16_46697994	51	29	42	67	53	58	23	27	17	50	29	61	0	0	0	0.01	0	0.02	0.17	0	0	0.04	0	0	ORC6
chr16_48352443	18	16	18	39	17	15	14	21	12	11	23	22	0	0.06	0	0	0.12	0.2	0.07	0	0	0	0	0.18	LONP2
chr16_48352444	22	17	18	41	16	15	14	22	14	11	22	22	0	0	0	0	0.19	0	0	0	0	0	0	0.27	LONP2
chr16_48353385	23	16	18	22	23	16	21	19	16	12	20	15	0.48	0.69	0.61	0.5	0.65	0.56	0.67	0.63	0.69	0.67	0.35	0.67	LONP2
chr16_48353399	24	17	18	22	23	19	21	20	16	12	20	15	0	0	0.17	0	0	0	0.05	0.05	0	0	0	0	LONP2
chr16_70248638	17	16	24	11	23	15	17	15	18	17	25	25	0	0	0	0.09	0.04	0	0.06	0	0	0.06	0.08	0.08	NA
chr16_70250750	15	17	13	29	14	14	13	12	18	10	18	22	0	0	0	0.03	0	0	0	0	0	0.1	0.06	0	EXOSC6
chr16_74622407	51	48	42	35	41	52	39	44	36	35	46	42	0.02	0	0	0	0.07	0.04	0.13	0	0.03	0.03	0.11	0.02	RFWD3
chr16_74668294	44	33	20	50	55	47	19	22	16	31	32	23	0.95	0.97	0.9	1	1	0.98	1	0.95	1	0.94	0.97	1	NA
chr16_75598215	28	13	12	13	24	13	25	10	25	13	15	13	0.04	0	0	0	0	0	0	0	0	0	0	0.23	NA
chr16_75599219	82	43	57	59	56	59	45	71	44	52	78	61	0.02	0.07	0.05	0.03	0.07	0.03	0.04	0.04	0.02	0.1	0.05	0.07	ADAT1
chr16_75599220	82	43	58	62	56	59	45	72	46	54	80	63	0.01	0	0	0	0.07	0	0.04	0.03	0.04	0	0.06	0.1	ADAT1
chr17_1464985	113	87	103	87	81	93	109	130	83	89	88	102	0.08	0.08	0.05	0.13	0.07	0.08	0.04	0.08	0.06	0.09	0.15	0.03	MYO1C
chr17_1464988	109	90	99	86	84	91	105	134	80	87	88	100	0.06	0.01	0.06	0.05	0.06	0.07	0.03	0.05	0.01	0.05	0.11	0.06	MYO1C
chr17_1464989	110	89	101	85	83	89	107	131	83	87	88	100	0.07	0.04	0.06	0.09	0.07	0.04	0.07	0.07	0.05	0.05	0.08	0.05	MYO1C
chr17_1464990	112	90	101	86	84	91	108	132	82	87	87	101	0.1	0.1	0.05	0.19	0.19	0.08	0.11	0.12	0.1	0.14	0.15	0.05	MYO1C
chr17_1464994	111	88	103	83	83	90	109	133	81	87	86	100	0.11	0.01	0.1	0.19	0.12	0.09	0.09	0.1	0.07	0.07	0.08	0.07	MYO1C
chr17_1470224	77	53	59	64	37	56	88	52	67	43	68	46	0.34	0.36	0.44	0.42	0.35	0.34	0.4	0.56	0.46	0.37	0.41	0.43	MYO1C
chr17_16775857	26	19	17	21	26	24	32	44	24	28	47	51	0.04	0	0.06	0	0.04	0.12	0	0	0	0.04	0	0	NA
chr17_18651641	14	16	15	18	29	12	27	16	21	13	26	22	0.5	0.5	0.47	0.5	0.79	0.67	0.56	0.88	0.62	0.54	0.62	0.73	NA
chr17_30186001	40	37	32	45	41	33	28	36	42	39	43	47	0.05	0.05	0.09	0.07	0.07	0.12	0.07	0.03	0.05	0.08	0.02	0.09	NSRP1
chr17_37614096	21	21	17	41	23	17	16	10	15	22	19	18	0	0	0	0	0	0	0	0	0	0	0.05	0.17	DDX52
chr17_38919643	41	50	35	25	40	39	45	48	58	34	39	43	0	0	0	0.08	0.05	0.05	0.02	0	0	0.03	0	0	LASP1
chr17_44799026	25	26	29	39	22	29	15	16	18	11	17	11	0.44	0.08	0.38	0.26	0.18	0.31	0.07	0.19	0.28	0.64	0.53	0.36	GJC1
chr17_44799030	27	30	32	42	24	33	17	20	17	13	18	15	0	0.07	0.06	0.1	0	0.09	0.06	0.2	0	0.31	0.17	0.07	GJC1
chr17_44799034	25	29	28	41	23	35	14	19	15	12	18	16	0	0	0	0	0	0.03	0	0	0	0.17	0.11	0	GJC1
chr17_44799035	25	29	30	39	21	35	14	15	13	12	18	15	0	0	0	0	0	0	0	0	0	0.17	0	0	GJC1
chr17_47118585	18	14	23	18	19	31	17	20	14	30	12	30	0.11	0	0.09	0.22	0.53	0.55	0	0.15	0.14	0.2	0.5	0.23	CDC27
chr17_59201912	73	63	57	30	46	32	22	43	24	19	10	28	0.16	0.11	0.11	0.1	0.07	0.25	0.36	0.44	0.33	0.11	0.2	0.21	PRR11
chr17_59201916	73	63	53	30	46	33	21	43	23	20	10	27	0.18	0.29	0.25	0.07	0.11	0.18	0.24	0.37	0.26	0.5	0.2	0.11	PRR11
chr17_59201920	74	63	56	30	47	32	23	44	23	20	11	28	0.53	0.56	0.45	0.4	0.23	0.38	0.43	0.5	0.61	0.35	0.27	0.36	PRR11
chr17_59201921	74	64	58	30	48	33	23	43	23	20	10	28	0.82	0.94	0.79	0.63	0.69	0.82	0.87	0.91	0.96	0.75	0.5	0.75	PRR11
chr17_59201923	74	66	57	31	47	36	22	44	26	20	12	29	0.57	0.67	0.58	0.55	0.55	0.44	0.64	0.45	0.5	0.55	0.08	0.66	PRR11
chr17_59202355	156	89	128	91	52	60	54	87	64	26	29	43	0.01	0	0.02	0.05	0.02	0.02	0.04	0.08	0.03	0	0.07	0.02	PRR11
chr17_59202404	58	44	50	49	27	29	39	20	25	20	19	11	0	0	0	0	0.04	0	0	0	0	0.05	0.11	0	PRR11
chr17_59204110	64	60	58	29	35	32	29	30	21	10	16	19	0	0	0.02	0.14	0	0.03	0.03	0.03	0	0	0	0.16	PRR11
chr17_7389863	65	68	77	51	62	72	78	64	54	30	58	66	0.02	0.01	0	0.06	0.05	0.07	0	0.02	0.02	0.03	0.07	0.03	PLSCR3
chr17_75889831	32	24	40	56	25	20	31	34	39	22	34	23	0	0	0.05	0.07	0.16	0.15	0.03	0.03	0.08	0.09	0.21	0.09	TRIM65
chr17_75890131	21	12	33	17	22	16	24	16	17	20	18	24	0	0.08	0.03	0.24	0.18	0.31	0.12	0.06	0	0.05	0.11	0.25	TRIM65
chr17_75890138	21	12	33	17	21	16	23	16	18	20	18	24	0	0	0	0	0.1	0	0	0	0	0.1	0	0.12	TRIM65
chr17_7668686	28	28	15	37	16	34	47	18	31	24	48	47	0.14	0.04	0	0.05	0.06	0.03	0.04	0.06	0.06	0.08	0.04	0	TP53
chr17_76778835	34	21	15	21	20	19	14	37	27	21	25	23	0.03	0	0	0.05	0.05	0.16	0	0.05	0	0	0.04	0.13	MFSD11
chr17_81560955	17	15	11	31	33	18	13	27	19	25	40	19	0	0	0.09	0.1	0.03	0	0.08	0	0	0.08	0.1	0.05	NA
chr18_31547689	29	14	17	12	15	11	24	24	22	22	15	14	0.03	0.21	0.06	0.08	0.07	0	0	0.04	0.09	0.05	0	0	DSG2
chr19_10930148	18	11	14	24	20	18	15	15	11	12	20	15	0	0	0	0	0.1	0.11	0	0	0	0	0.05	0	C19orf52
chr19_11145996	62	46	49	47	34	30	14	15	14	14	19	14	0.11	0.09	0.06	0.26	0.12	0.27	0	0.13	0	0.14	0	0.14	NA
chr19_11146013	57	37	44	33	26	23	10	18	11	12	16	11	0.14	0.24	0.34	0.33	0.35	0.39	0.3	0.28	0.18	0.17	0.5	0.36	NA
chr19_12875556	17	12	10	28	14	18	22	25	22	17	19	21	0.06	0.08	0.1	0	0	0.06	0.05	0	0	0	0	0	DNASE2
chr19_17582092	157	76	113	160	115	123	59	99	53	50	64	54	0.03	0.05	0.08	0.04	0.03	0.02	0	0	0	0.04	0.02	0	COLGALT1
chr19_17582177	35	33	44	44	34	23	20	19	14	11	22	15	0.11	0.06	0.02	0	0.03	0	0	0	0	0	0	0	COLGALT1
chr19_41260574	37	20	29	52	32	27	42	22	24	19	40	25	0.05	0.05	0.1	0	0.03	0.04	0	0	0.04	0.11	0	0	AXL
chr19_44662304	13	19	18	18	13	20	21	14	16	14	10	10	0.08	0.05	0.11	0.33	0.08	0.05	0.05	0	0.12	0.07	0.3	0.2	PVR
chr19_44662309	18	20	20	19	14	16	33	14	17	16	16	13	0.11	0	0	0.32	0.07	0.12	0.06	0	0.12	0.12	0.25	0.31	PVR
chr19_57863081	20	10	12	21	17	16	15	18	13	18	21	34	0.05	0	0.17	0.05	0.06	0	0	0	0	0	0.19	0.12	ZNF587
chr19_57864869	39	30	27	64	35	29	35	40	31	41	47	45	0.08	0.17	0.48	0.38	0.51	0.45	0.49	0.35	0.32	0.51	0.4	0.53	ZNF587
chr19_58584115	83	34	29	60	60	70	49	63	62	36	42	53	0.76	0.71	0.45	0.93	0.97	0.86	0.57	0.73	0.79	0.81	0.86	0.92	CENPBD1P1
chr19_58584165	55	49	42	54	50	37	28	55	29	36	48	43	0.2	0.1	0.07	0.26	0.18	0.41	0.11	0.15	0.17	0.31	0.21	0.23	CENPBD1P1
chr19_6379671	24	19	28	33	27	21	31	23	19	24	25	34	0	0	0	0.09	0	0.1	0.03	0.09	0.05	0	0.04	0.03	GTF2F1
chr2_113597590	36	33	45	69	54	67	46	56	55	73	65	57	0.72	0.58	0.6	0.48	0.57	0.61	0.46	0.52	0.49	0.51	0.6	0.6	WASH2P
chr2_113598894	12	27	22	34	34	26	15	29	27	26	39	30	0.58	0.63	0.5	0.65	0.5	0.5	0.33	0.48	0.56	0.42	0.36	0.53	WASH2P
chr2_128191705	19	11	27	23	17	13	12	26	16	16	13	13	0.11	0	0	0.04	0	0	0	0	0	0	0.15	0	UGGT1
chr2_128191707	20	12	26	25	17	15	12	27	17	18	13	13	0	0.17	0	0	0	0	0	0	0	0	0	0	UGGT1
chr2_128191710	21	13	28	23	18	15	15	30	19	19	13	13	0.05	0.08	0.04	0.04	0	0	0	0.07	0.05	0	0	0	UGGT1
chr2_128191735	42	23	33	50	35	40	23	42	29	38	25	33	0.12	0.09	0.06	0.04	0	0	0.13	0.07	0.03	0	0.08	0	UGGT1
chr2_189747256	19	11	18	32	17	13	12	21	12	16	24	20	0	0.09	0	0	0.06	0	0	0	0.08	0.12	0.12	0.15	NA
chr2_190934852	309	241	263	245	155	183	265	284	238	166	186	236	0.01	0.01	0.01	0.09	0.05	0.05	0	0	0.01	0.05	0.02	0.06	GLS
chr2_190934866	304	216	233	239	128	153	246	276	182	131	169	197	0.13	0.11	0.12	0.47	0.41	0.42	0.14	0.13	0.12	0.32	0.34	0.27	GLS
chr2_201167242	23	15	16	34	13	18	26	20	26	26	32	26	0.04	0.07	0.06	0.09	0.08	0.11	0	0	0.04	0.04	0.06	0	CFLAR
chr2_201167246	24	16	16	35	13	18	27	20	27	26	32	26	0.17	0.06	0.06	0.14	0.31	0.11	0.04	0.1	0.07	0.15	0.09	0.08	CFLAR
chr2_20251058	27	19	13	24	19	18	15	18	19	14	15	13	0.04	0	0.15	0.38	0.53	0.33	0.2	0.06	0.05	0.14	0.13	0.31	PUM2
chr2_206123001	50	32	27	29	16	17	30	37	34	24	15	31	0.32	0.25	0.15	0.59	0.44	0.53	0.43	0.32	0.18	0.38	0.47	0.48	NA
chr2_206123002	50	32	28	29	16	17	29	37	34	25	15	31	0.02	0.09	0	0	0.06	0.06	0	0.03	0	0	0.13	0.06	NA
chr2_206123007	48	31	26	28	14	16	28	36	34	25	16	30	0.1	0	0.04	0.32	0.14	0.38	0.11	0.06	0.09	0.28	0.12	0.2	NA
chr2_206123008	50	31	27	29	15	17	27	36	34	25	16	30	0.2	0.03	0.15	0.48	0.53	0.41	0.15	0.22	0.09	0.24	0.19	0.3	NA
chr2_206123014	50	30	25	28	18	17	27	36	33	24	16	31	0.16	0	0.16	0.46	0.39	0.24	0.3	0.17	0.06	0.38	0.19	0.32	NA
chr2_206123016	49	30	26	29	18	17	28	36	33	25	16	28	0	0	0	0.07	0.06	0	0.04	0	0	0.08	0.06	0.18	NA
chr2_3544913	20	21	17	11	10	13	17	25	23	14	12	28	0	0	0	0	0	0.08	0.12	0.04	0	0	0	0	RNASEH1
chr2_37100446	21	12	11	65	71	47	11	10	14	30	56	50	0.1	0	0	0.17	0.11	0	0	0.1	0.07	0.17	0.05	0.18	NA
chr2_37100447	20	12	11	66	71	48	11	10	14	30	54	48	0.2	0.25	0.18	0.47	0.38	0.52	0.09	0.2	0.21	0.17	0.39	0.31	NA
chr2_37100471	14	12	16	52	59	36	10	14	10	28	46	33	0	0	0.25	0.17	0.19	0.17	0.1	0.07	0.2	0.21	0.11	0.06	NA
chr2_37100869	11	22	17	45	31	30	19	31	18	34	28	31	0	0.05	0.06	0.09	0.1	0	0	0	0.06	0.12	0.07	0.03	NA
chr2_37100870	13	23	16	43	31	31	19	30	18	34	27	31	0.08	0.09	0.06	0.33	0.23	0.13	0.05	0	0.06	0.44	0.19	0	NA
chr2_37100873	13	22	16	42	32	31	22	31	18	34	28	31	0	0.05	0.06	0.1	0.06	0.03	0	0.03	0	0.06	0.04	0.03	NA
chr2_37100957	12	13	19	36	35	15	12	10	11	20	45	18	0	0	0	0.08	0.17	0	0.08	0	0	0.15	0.07	0	NA
chr2_37102140	23	29	14	82	54	59	11	19	19	61	60	52	0.09	0.07	0.07	0.17	0.2	0.17	0.09	0.11	0.16	0.1	0.12	0.17	NA
chr2_37104484	19	15	10	26	29	33	13	21	15	32	37	39	0	0.13	0	0.12	0.1	0.21	0.08	0.19	0	0.06	0.11	0.1	NA
chr2_37104602	76	38	49	255	185	164	41	88	51	144	162	174	0.13	0.11	0.1	0.33	0.27	0.24	0.2	0.09	0.1	0.17	0.15	0.19	NA
chr2_37104607	76	39	47	251	171	160	40	88	51	140	159	166	0.08	0.15	0.11	0.37	0.33	0.29	0.3	0.17	0.25	0.19	0.18	0.25	NA
chr2_37202524	20	14	14	12	16	18	38	32	34	23	21	20	0.15	0	0.14	0.08	0.06	0	0	0.06	0.06	0	0.05	0	CEBPZOS
chr2_37202525	20	14	14	12	15	18	37	31	32	23	21	21	0.15	0	0.07	0.08	0.2	0	0	0.06	0.06	0.09	0.1	0.05	CEBPZOS
chr2_37202534	34	19	21	16	24	22	44	44	38	30	28	26	0.29	0.32	0.38	0.56	0.58	0.14	0.41	0.3	0.24	0.33	0.36	0.38	CEBPZOS
chr2_37202546	42	20	24	17	25	22	49	44	40	31	28	26	0.17	0.15	0.12	0.12	0.08	0	0.02	0.07	0.05	0.1	0.07	0.08	CEBPZOS
chr2_37202547	43	20	24	18	26	22	49	43	40	31	28	25	0.09	0.1	0.04	0.06	0.15	0	0	0.02	0.03	0.03	0.11	0.04	CEBPZOS
chr2_85319275	45	28	36	42	21	26	26	33	20	21	19	19	0.04	0.07	0.11	0.12	0.05	0.04	0	0.03	0.05	0.05	0	0.26	TGOLN2
chr2_85319334	62	55	55	81	49	45	34	75	50	38	31	39	0.1	0.02	0.18	0.09	0.06	0.04	0.06	0.04	0.12	0.05	0	0.08	TGOLN2
chr2_85319342	48	37	46	55	33	29	27	43	33	28	18	28	0.06	0.03	0.07	0.07	0.03	0.14	0.11	0	0.06	0.11	0	0.11	TGOLN2
chr2_85319449	45	31	34	32	32	23	52	31	27	23	32	20	0.02	0	0.06	0.09	0.03	0.04	0.02	0.03	0.04	0.04	0.06	0	TGOLN2
chr2_91654564	30	18	20	13	10	17	21	28	24	19	24	26	0.13	0.06	0.15	0.23	0.4	0.12	0.14	0.25	0.12	0.26	0.25	0.27	NA
chr2_99196488	32	22	19	11	10	11	34	29	23	27	25	27	0	0	0	0	0.3	0.09	0	0.07	0.13	0.26	0.24	0.11	MRPL30
chr20_34749948	36	49	52	67	49	48	41	46	43	56	57	62	0.39	0.63	0.56	0.51	0.53	0.52	0.56	0.43	0.51	0.55	0.53	0.48	NCOA6
chr20_37519161	12	12	15	15	14	12	24	18	17	27	46	28	0.08	0.08	0	0	0.14	0	0.04	0	0	0	0	0	BLCAP
chr20_3867567	30	42	39	29	25	26	30	35	36	25	25	33	0.1	0.14	0.13	0.07	0.16	0.27	0.17	0.26	0.08	0.12	0.08	0.12	MAVS
chr20_3867578	28	44	37	31	25	26	31	35	37	26	27	36	0.18	0.27	0.16	0.19	0.16	0.23	0.23	0.26	0.32	0.23	0.22	0.31	MAVS
chr20_3872331	22	11	16	20	22	19	19	19	22	11	19	14	0.05	0.09	0.12	0.15	0.05	0.11	0.05	0.11	0.05	0.09	0	0	MAVS
chr20_3872420	22	25	23	24	12	13	31	23	19	25	28	15	0.09	0.2	0.13	0.08	0.17	0.15	0.16	0.04	0.21	0.16	0.18	0.07	MAVS
chr20_3873413	31	19	20	30	13	14	28	45	33	19	18	18	0.1	0	0.05	0.07	0	0.21	0.04	0.07	0.12	0.05	0.11	0.11	MAVS
chr20_3873414	33	19	20	30	13	13	28	45	33	19	18	19	0.06	0	0.05	0.03	0	0	0.04	0.09	0.03	0	0.06	0.11	MAVS
chr20_3875197	31	30	16	23	20	17	29	31	24	21	25	15	0.06	0.03	0	0.04	0.05	0.06	0.03	0.06	0	0.1	0	0	MAVS
chr20_45079068	25	35	20	36	27	33	26	32	33	41	40	44	0.28	0.11	0.45	0.42	0.59	0.61	0.19	0.12	0.27	0.51	0.57	0.45	STK4
chr20_45079095	28	38	22	37	30	35	24	32	33	42	42	42	0	0.05	0.05	0.16	0.03	0.09	0	0	0.06	0.07	0.12	0	STK4
chr20_5994631	31	15	16	22	12	18	14	28	13	20	17	13	0.16	0.07	0.06	0.14	0.17	0.17	0.14	0.04	0.31	0.05	0.29	0	MCM8
chr20_5994643	37	17	20	26	12	19	16	33	16	23	19	14	0.03	0	0.05	0	0	0	0.06	0.03	0.06	0.04	0	0	MCM8
chr20_5994644	38	18	20	25	12	19	16	33	16	24	18	15	0.03	0	0	0	0.08	0.21	0.19	0.06	0.06	0.04	0.06	0	MCM8
chr21_33551013	91	87	92	148	109	109	84	117	121	107	130	131	0.05	0.03	0.07	0.12	0.19	0.11	0.07	0.1	0.19	0.2	0.15	0.17	SON
chr21_33551799	34	32	27	38	43	38	37	12	31	33	39	31	0	0	0.04	0.03	0.07	0.05	0.14	0.08	0	0.09	0.08	0.16	SON
chr21_45512815	32	27	23	40	24	32	24	20	17	10	12	14	0	0	0	0	0	0.03	0	0.05	0	0	0.17	0	COL18A1
chr22_39018767	129	86	130	127	114	120	104	131	112	93	120	143	0.11	0.13	0.18	0.43	0.43	0.29	0.18	0.14	0.15	0.34	0.32	0.27	APOBEC3C
chr22_39018907	14	22	23	23	18	14	30	13	19	27	31	23	0.43	0.27	0.17	0.48	0.56	0.79	0.47	0.23	0.21	0.52	0.55	0.3	NA
chr22_39018918	17	24	24	24	19	20	29	12	20	28	30	19	0	0	0.04	0	0	0.05	0.07	0	0	0.07	0.07	0.05	NA
chr22_39019910	29	18	18	22	14	17	21	36	17	16	21	14	0.03	0	0	0	0	0.06	0.05	0	0	0	0	0.29	NA
chr22_39019923	26	18	15	23	23	18	26	35	19	15	27	15	0	0	0	0	0.35	0	0	0	0	0	0	0.07	NA
chr22_39019976	26	28	37	21	17	24	36	20	25	32	31	30	0	0	0	0.14	0.35	0	0.03	0.05	0.04	0.06	0.06	0.1	NA
chr3_10151674	15	15	14	18	21	14	15	24	20	15	15	33	0.33	0.13	0.07	0.39	0.19	0.43	0.13	0.08	0.15	0.47	0.47	0.39	VHL
chr3_10151882	34	13	23	24	15	22	18	22	21	16	18	21	0	0	0	0.17	0	0.05	0	0	0	0.12	0.17	0	VHL
chr3_10151922	48	13	33	35	22	35	35	40	15	22	27	27	0	0.15	0.03	0.06	0.09	0.03	0	0.03	0.07	0.05	0.07	0.04	VHL
chr3_10151940	22	15	31	24	23	25	46	26	14	25	30	19	0	0	0.03	0.04	0.13	0.16	0.02	0	0.07	0	0.03	0.26	VHL
chr3_10151941	22	16	30	24	23	25	45	25	14	26	32	19	0.05	0	0	0.04	0.13	0.08	0.02	0	0.07	0.08	0.12	0.05	VHL
chr3_10153279	27	16	27	20	21	13	36	24	24	16	16	18	0	0	0	0.05	0	0.15	0	0	0.08	0	0	0	VHL
chr3_10153295	29	16	25	22	21	17	42	24	26	17	19	19	0.1	0	0.08	0.05	0.05	0.24	0.07	0.12	0.04	0	0.05	0.05	VHL
chr3_10153299	29	18	25	23	21	16	42	25	27	17	20	19	0.03	0.17	0.08	0.09	0.05	0.31	0.05	0.04	0	0.06	0.05	0	VHL
chr3_10153300	30	18	27	21	21	17	42	25	27	17	20	17	0.03	0.06	0.04	0.14	0.05	0.18	0.05	0.08	0	0.12	0.1	0.06	VHL
chr3_10153304	28	18	25	23	20	16	41	25	27	16	19	18	0	0	0	0.09	0.05	0.06	0.02	0.04	0.11	0.06	0.11	0	VHL
chr3_14944964	38	28	42	33	33	19	23	39	33	17	24	11	0.03	0.04	0.07	0.09	0.24	0.11	0	0.13	0.06	0.12	0.12	0	FGD5-AS1
chr3_150627664	143	100	99	96	131	105	142	140	115	111	106	96	0.05	0	0.02	0.08	0.18	0.21	0.06	0.02	0.02	0.13	0.18	0.17	SELT
chr3_156541440	21	29	29	28	16	12	28	21	21	14	31	26	0.29	0.1	0.14	0.32	0.12	0.42	0.21	0.1	0.38	0.14	0.29	0.23	SSR3
chr3_156541607	55	43	41	44	31	27	57	36	34	18	31	31	0.04	0.02	0.02	0.05	0.13	0.19	0.05	0.06	0	0.17	0.06	0.03	SSR3
chr3_156541617	56	44	38	39	34	28	52	37	38	21	29	28	0.7	0.84	0.84	0.79	0.79	1	0.67	0.76	0.79	0.52	0.79	0.82	SSR3
chr3_156541618	57	45	38	39	35	27	52	37	39	21	30	28	0.7	0.71	0.74	0.74	0.71	0.93	0.58	0.73	0.74	0.67	0.7	0.64	SSR3
chr3_179397623	63	54	45	84	70	52	41	41	43	54	78	69	0.14	0.06	0.02	0.24	0.26	0.37	0.15	0.07	0.05	0.2	0.14	0.25	GNB4
chr3_179397767	52	37	37	68	50	56	25	43	36	33	64	55	0	0	0.03	0.12	0.06	0.04	0	0.05	0.03	0.03	0.05	0.04	GNB4
chr3_179397783	84	71	69	92	88	87	31	63	52	60	82	82	0.06	0.07	0.1	0.18	0.2	0.18	0.16	0.03	0.1	0.07	0.12	0.11	GNB4
chr3_179397789	87	68	68	94	89	83	28	63	51	58	86	82	0.02	0.1	0.04	0.11	0.08	0.13	0	0.02	0.02	0.02	0.05	0.06	GNB4
chr3_179397868	23	25	24	28	24	35	17	13	10	10	26	13	0	0.36	0.12	0.18	0.17	0.2	0.06	0	0	0.2	0.19	0.15	GNB4
chr3_33142759	49	64	81	56	76	66	44	30	65	34	61	51	0.04	0.02	0.01	0.02	0.03	0	0	0	0.03	0.09	0.02	0.04	CRTAP
chr3_44749985	30	23	32	27	23	19	27	23	38	12	22	14	0.03	0	0.03	0.07	0.09	0.05	0.07	0	0.05	0	0.09	0.07	KIAA1143
chr3_44749988	27	28	35	28	24	19	28	26	39	13	22	15	0.07	0.04	0.06	0.14	0.21	0.26	0.18	0.04	0.08	0.08	0.05	0.07	KIAA1143
chr3_44749989	29	29	36	28	24	19	28	25	41	13	22	15	0.03	0.03	0.03	0.11	0.04	0.11	0	0.04	0	0.08	0.09	0	KIAA1143
chr3_44750020	23	24	29	27	18	19	24	17	27	10	17	13	0.09	0.04	0.07	0.26	0.06	0.21	0.04	0.06	0.07	0	0.29	0.15	KIAA1143
chr3_49359890	297	221	210	326	201	229	414	366	303	228	270	266	0.07	0.08	0.06	0.4	0.37	0.35	0.08	0.05	0.12	0.25	0.27	0.28	RHOA
chr3_58156064	210	182	154	196	174	139	214	222	180	156	189	207	0.13	0.07	0.14	0.3	0.3	0.27	0.22	0.32	0.25	0.44	0.42	0.35	FLNB
chr4_109689104	40	19	22	28	26	33	17	31	25	28	29	26	0.03	0	0	0.04	0	0	0.18	0.03	0	0	0.03	0.04	CASP6
chr4_109689108	41	17	26	31	29	34	18	33	24	30	30	28	0.05	0.06	0.04	0.06	0	0.03	0.11	0	0.08	0	0.03	0.07	CASP6
chr4_176331087	42	28	41	27	21	36	47	56	20	22	31	28	0.07	0.07	0.12	0.3	0.24	0.19	0.06	0.12	0.05	0.09	0.16	0.32	SPCS3
chr4_184299303	38	82	129	147	65	84	65	193	64	107	72	127	0.21	0.09	0.04	0.05	0.18	0.11	0.12	0.02	0.09	0.13	0.11	0.13	NA
chr4_38944674	27	18	24	25	16	21	29	19	27	13	21	34	0	0.06	0.04	0	0.12	0.29	0.03	0.11	0	0.08	0.05	0.06	FAM114A1
chr4_56459990	55	28	28	28	20	19	42	76	24	17	35	22	0.02	0.11	0.07	0.18	0.1	0	0.02	0.04	0.04	0.06	0.14	0.14	PAICS
chr4_56459993	58	28	29	27	25	22	43	75	22	19	36	22	0.07	0.04	0.03	0.33	0.16	0.27	0.12	0.15	0.05	0.05	0.14	0.18	PAICS
chr4_56460020	88	39	55	50	42	37	47	77	43	31	45	33	0.06	0.03	0	0.18	0.19	0.16	0.02	0	0	0.13	0.07	0.09	PAICS
chr4_56460087	23	21	24	10	16	16	15	14	12	18	17	12	0.04	0	0	0.1	0	0.06	0.07	0	0	0.06	0.06	0.17	PAICS
chr4_56460096	50	53	64	31	33	40	52	44	39	37	42	29	0.16	0.08	0.03	0.29	0.45	0.33	0.12	0.02	0.05	0.24	0.45	0.21	PAICS
chr4_56460122	54	53	68	32	32	35	60	47	42	34	46	31	0	0	0	0.12	0.12	0.09	0.02	0	0	0.12	0.02	0.06	PAICS
chr4_56460125	53	53	68	32	31	38	60	49	41	35	42	31	0.6	0.53	0.44	0.69	0.68	0.61	0.48	0.51	0.56	0.71	0.74	0.71	PAICS
chr4_56460126	52	53	67	33	31	37	60	49	41	33	42	31	0.06	0	0	0.09	0.03	0.14	0.02	0.02	0.05	0.03	0.1	0.03	PAICS
chr4_56460699	31	25	21	19	17	17	30	15	15	15	17	22	0	0	0	0	0	0.06	0	0	0	0.07	0.12	0	PAICS
chr4_56460707	27	25	16	14	18	15	18	13	11	10	17	16	0.15	0	0	0.21	0	0.27	0.17	0	0	0.1	0.12	0.06	PAICS
chr4_56460709	27	26	16	14	16	15	21	13	10	10	17	15	0.33	0.19	0.06	0.21	0.38	0.4	0.43	0.08	0.2	0.3	0.29	0.53	PAICS
chr4_56460713	27	28	18	18	24	15	21	13	10	10	16	17	0.15	0.21	0.22	0.56	0.62	0.47	0.33	0	0.2	0.2	0.44	0.18	PAICS
chr4_56460850	37	21	34	26	11	18	31	28	22	10	16	12	0	0.05	0	0	0.09	0.06	0	0	0	0	0.06	0	PAICS
chr4_56460851	36	22	34	26	12	18	30	28	22	11	16	12	0.06	0.05	0.03	0.46	0.33	0.22	0.07	0	0.09	0.36	0.31	0.58	PAICS
chr4_56460856	38	22	35	26	11	19	31	26	22	11	16	14	0.05	0.05	0.03	0.46	0.18	0.37	0	0.04	0.09	0.18	0.25	0.43	PAICS
chr4_56460931	52	34	31	37	12	15	33	40	20	18	30	14	0.23	0.18	0.06	0.27	0.33	0.27	0.03	0.12	0.05	0.22	0.23	0.14	PAICS
chr4_56460942	54	36	31	38	12	16	34	42	22	17	25	14	0.02	0.03	0	0.11	0.25	0	0	0	0	0	0.04	0	PAICS
chr4_56460950	63	42	39	41	15	22	38	44	25	22	36	17	0.14	0.19	0.1	0.22	0.27	0.05	0.03	0.05	0.04	0.18	0.08	0.06	PAICS
chr5_109335497	88	62	98	87	60	78	86	137	102	94	78	109	0.03	0.05	0.02	0.09	0.05	0.12	0.02	0.01	0.01	0.09	0.05	0.17	PJA2
chr5_115830603	27	33	20	33	34	54	39	41	41	37	44	23	0.07	0	0.1	0.12	0.18	0.07	0.03	0.02	0.05	0.24	0.11	0.17	ATG12
chr5_126626790	19	13	20	25	12	11	25	31	25	17	13	24	0.05	0.15	0	0.16	0	0	0.08	0.06	0.04	0.06	0.08	0.04	PHAX
chr5_126626791	19	13	20	25	12	11	25	31	25	17	13	24	0	0	0	0.12	0.17	0	0	0	0	0	0	0	PHAX
chr5_131159879	14	16	15	15	15	14	22	23	20	21	13	18	0	0	0	0	0	0	0	0	0	0	0.15	0	NA
chr5_131159881	16	18	21	17	17	17	26	27	24	24	14	22	0	0	0	0	0.06	0	0.04	0.11	0.04	0.04	0.07	0	NA
chr5_157477823	134	102	115	118	84	89	74	99	90	48	35	73	0.33	0.26	0.34	0.54	0.65	0.62	0.32	0.28	0.37	0.58	0.6	0.62	ADAM19
chr5_157477825	135	106	125	123	92	94	77	103	97	50	37	75	0.01	0.03	0.03	0.1	0.13	0.07	0.08	0.01	0.06	0.1	0.14	0.13	ADAM19
chr5_157477845	153	137	140	152	112	116	97	124	105	64	49	85	0.07	0.09	0.11	0.22	0.33	0.31	0.04	0.09	0.1	0.19	0.22	0.21	ADAM19
chr5_157477914	35	24	38	22	23	25	27	20	12	14	20	12	0.17	0.12	0.08	0.09	0.48	0.24	0.15	0.1	0.25	0.14	0.35	0.33	ADAM19
chr5_157477921	37	22	33	25	23	11	29	17	16	12	21	11	0	0	0.03	0.12	0.04	0.09	0.07	0	0	0.08	0	0	ADAM19
chr5_157477937	51	43	54	26	22	21	34	23	23	16	18	12	0.02	0	0	0.04	0.14	0	0	0	0.04	0	0.06	0.17	ADAM19
chr5_157477939	44	45	52	27	21	23	32	24	24	16	17	10	0	0	0	0.07	0.05	0.04	0	0	0	0.06	0	0	ADAM19
chr5_157477942	44	46	54	28	22	22	36	26	24	16	16	11	0.2	0.09	0.07	0.57	0.41	0.45	0.11	0.08	0.08	0.5	0.44	0.36	ADAM19
chr5_157477943	43	46	55	27	22	22	36	26	24	17	16	11	0	0	0	0.26	0	0.09	0	0	0	0	0	0	ADAM19
chr5_157477944	45	46	55	25	22	23	36	26	23	17	16	11	0.11	0.07	0	0.16	0.18	0.17	0	0.08	0	0.18	0.06	0.55	ADAM19
chr5_157477945	45	47	57	26	21	22	36	26	23	17	15	11	0.04	0.04	0.04	0.31	0.14	0.09	0	0.08	0	0.12	0	0.18	ADAM19
chr5_157477957	59	53	63	26	23	32	43	24	31	20	19	17	0.03	0.13	0.13	0.35	0.17	0.25	0.16	0.17	0.06	0.35	0.21	0.24	ADAM19
chr5_157477967	37	41	43	23	13	28	27	18	24	13	11	15	0	0	0	0.04	0.08	0.21	0	0	0	0	0.09	0	ADAM19
chr5_157478374	47	46	47	41	30	38	28	25	23	25	28	30	0	0	0	0.1	0.07	0.03	0	0.04	0.04	0.04	0.07	0.07	ADAM19
chr5_157478388	50	52	46	32	27	33	39	25	34	18	25	32	0.3	0.08	0.09	0.44	0.48	0.7	0.18	0.08	0.06	0.44	0.68	0.34	ADAM19
chr5_157478389	62	57	53	41	36	35	52	30	40	22	31	34	0.18	0.11	0.06	0.37	0.36	0.49	0.15	0.2	0.05	0.55	0.55	0.26	ADAM19
chr5_157478390	62	64	58	49	46	42	52	34	43	28	35	34	0.08	0.05	0.07	0.31	0.22	0.19	0.1	0.12	0.09	0.43	0.2	0.26	ADAM19
chr5_157478397	93	78	73	76	80	69	75	53	57	39	56	44	0.02	0.01	0	0.05	0.01	0.09	0	0	0.02	0.05	0.07	0.02	ADAM19
chr5_157478403	98	81	75	81	83	72	77	56	59	44	59	53	0.06	0	0.05	0.19	0.14	0.1	0.09	0.07	0.03	0.18	0.07	0.09	ADAM19
chr5_157478412	87	71	65	77	85	65	72	56	59	42	53	47	0	0.01	0.02	0.13	0.05	0.08	0	0.02	0.02	0.07	0.04	0	ADAM19
chr5_157478437	65	42	36	48	45	49	44	39	34	26	28	30	0	0	0	0.04	0.09	0.12	0	0	0.12	0.04	0.04	0.1	ADAM19
chr5_157478492	75	85	71	81	57	64	56	60	64	53	55	43	0.03	0	0.01	0.05	0.02	0.06	0	0.07	0.02	0.02	0.04	0.12	ADAM19
chr5_157478548	42	29	36	41	34	29	25	23	21	24	19	18	0.02	0.17	0.03	0.1	0.26	0.28	0	0.09	0	0.08	0	0.11	ADAM19
chr5_40762017	21	19	25	35	23	26	22	17	13	20	13	17	0	0	0.04	0	0	0	0	0	0.08	0.05	0	0.24	PRKAA1
chr5_43574171	18	14	20	29	13	20	23	23	13	16	29	26	0	0.14	0.05	0.1	0	0	0	0	0	0.12	0.21	0.04	NNT-AS1
chr5_79685800	29	21	16	49	28	22	31	36	24	37	42	37	0	0	0	0.06	0.04	0.05	0	0	0	0.14	0.05	0.05	PAPD4
chr6_149726023	47	30	49	51	33	26	28	30	27	23	40	47	0.02	0	0	0.06	0.03	0.08	0	0.03	0	0	0	0.02	NUP43
chr6_152989197	19	19	10	15	16	17	22	31	14	12	11	12	0.79	0.58	0.5	0.47	0.44	0.71	0.77	0.45	1	0.58	0.82	0.67	MTRF1L
chr6_159679899	34	15	23	48	32	30	42	43	31	44	84	56	0.03	0	0	0.02	0.06	0	0.02	0.02	0	0.07	0.08	0.02	NA
chr6_159679900	34	15	23	48	32	29	43	43	32	44	83	56	0.06	0	0	0.06	0.03	0.03	0	0.05	0	0.07	0.1	0.05	NA
chr6_159680770	29	10	12	20	15	19	29	21	20	30	32	34	0.03	0	0	0.1	0	0.11	0	0.1	0	0	0	0	NA
chr6_159680773	30	11	11	21	16	21	28	21	20	28	34	34	0.03	0	0	0	0	0.14	0	0	0.2	0.04	0.03	0	NA
chr6_31270484	432	519	497	1425	1036	1358	313	273	332	1053	1055	940	0.15	0.18	0.18	0.1	0.15	0.16	0.15	0.12	0.24	0.14	0.17	0.19	HLA-C
chr6_42887319	17	14	27	13	11	21	26	24	20	19	16	31	0	0.07	0	0.23	0	0.05	0.04	0	0.05	0.11	0.12	0.13	NA
chr6_42887421	24	12	25	10	10	13	18	26	21	11	27	20	0	0	0	0	0	0	0.06	0.12	0	0	0	0	NA
chr6_42887427	24	12	25	10	10	12	16	25	22	11	26	19	0.04	0	0.24	0	0	0.08	0	0	0	0	0.12	0	NA
chr6_42888326	34	10	36	21	10	17	40	43	48	12	32	25	0.03	0	0.08	0	0	0.18	0	0	0.04	0	0	0.04	NA
chr6_42888592	59	69	94	79	70	74	98	139	78	58	92	103	0.25	0.19	0.28	0.57	0.51	0.66	0.24	0.2	0.27	0.38	0.43	0.5	NA
chr6_42889283	58	29	38	51	14	18	42	74	42	21	26	28	0.03	0	0.08	0.08	0.14	0	0.1	0	0.02	0	0.04	0.04	NA
chr6_42889285	57	30	37	50	14	19	40	75	42	19	26	27	0.12	0.1	0.22	0.32	0.43	0.26	0.15	0.13	0.12	0.05	0.12	0.11	NA
chr6_42889288	60	34	49	51	16	19	49	82	44	22	29	31	0.02	0.03	0	0.04	0.06	0.05	0.04	0.05	0	0	0	0	NA
chr6_42889289	61	34	49	53	16	20	48	82	46	23	28	31	0.02	0	0.02	0.11	0.06	0.1	0	0.01	0.02	0	0	0	NA
chr6_42889290	62	34	50	53	16	19	47	82	47	23	28	32	0.05	0.03	0.04	0.13	0	0.05	0.11	0.04	0.17	0	0.07	0.09	NA
chr6_42889293	62	31	46	51	15	20	46	77	44	23	26	26	0.42	0.32	0.52	0.73	0.6	0.35	0.43	0.42	0.5	0.57	0.54	0.54	NA
chr6_43616442	11	17	12	14	18	11	10	22	13	15	16	13	0.09	0	0.08	0.07	0.06	0.09	0	0.14	0.23	0.13	0.25	0.08	POLH
chr6_43616468	23	20	22	19	22	10	11	26	17	14	15	14	0	0.05	0	0	0	0.2	0	0	0	0	0	0	POLH
chr6_89636948	14	19	14	25	19	13	20	22	18	17	17	24	0	0	0	0	0	0	0	0	0	0.12	0.12	0.04	LYRM2
chr7_102449600	53	34	36	35	32	33	46	62	43	25	38	18	0.13	0.03	0	0	0	0	0	0	0	0	0	0	ORAI2
chr7_128504285	54	31	31	39	31	30	29	44	31	16	21	28	0.07	0	0.06	0.13	0.19	0.03	0.03	0.02	0.1	0	0.05	0.07	NA
chr7_128504286	54	31	32	40	31	30	29	44	30	16	20	29	0.04	0	0	0.1	0.03	0.03	0	0	0	0	0.05	0	NA
chr7_40095079	18	17	14	29	15	18	17	29	17	17	27	29	0.5	0.53	0.71	0.59	0.53	0.56	0.47	0.52	0.71	0.65	0.63	0.62	CDK13
chr7_44801788	39	24	29	26	24	18	26	24	34	11	14	16	0.03	0	0.03	0.04	0	0	0.12	0	0.12	0	0.07	0	PPIA
chr7_44801789	39	25	29	25	24	16	27	24	35	11	14	16	0.1	0.08	0.03	0.12	0.04	0.12	0.11	0.04	0.03	0.27	0	0.12	PPIA
chr7_44833193	81	68	69	36	25	31	39	59	38	20	21	28	0	0.03	0.01	0	0.12	0.06	0.03	0.03	0	0	0	0.04	NA
chr7_44833615	38	36	43	24	15	18	24	17	18	11	10	11	0	0.11	0.02	0.04	0.2	0.06	0.04	0	0.06	0	0	0	H2AFV
chr7_44833617	37	40	43	24	16	18	24	15	18	11	10	11	0.11	0.05	0.02	0.04	0.06	0.11	0.08	0.07	0.06	0	0	0	H2AFV
chr7_44833623	39	42	43	22	13	18	27	17	20	10	10	12	0.05	0.14	0.23	0.23	0.54	0.33	0.11	0	0	0.3	0.4	0.33	H2AFV
chr7_44833624	41	42	47	25	13	18	26	17	21	11	10	12	0.02	0	0	0	0	0	0.12	0	0.05	0.09	0	0	H2AFV
chr7_66153941	43	28	36	41	18	31	33	49	32	30	43	43	0	0.11	0.11	0	0	0.03	0	0	0.03	0.03	0.07	0	CRCP
chr7_66153950	44	27	35	39	18	29	32	48	31	33	45	39	0.05	0.15	0.09	0.05	0	0.1	0.06	0	0.03	0.06	0.02	0.03	CRCP
chr7_66153973	27	18	25	30	17	16	23	28	26	15	24	24	0	0	0	0	0.18	0	0.04	0	0	0	0.04	0	CRCP
chr7_72993441	85	63	56	76	51	48	72	77	61	64	73	73	0.16	0.22	0.27	0.21	0.2	0.27	0.17	0.16	0.1	0.28	0.14	0.21	NA
chr7_72996168	34	25	11	30	20	24	31	49	29	21	35	23	0.06	0.08	0.09	0.07	0.2	0.08	0.19	0.04	0.07	0.1	0	0.13	NA
chr7_73282501	85	62	54	75	50	48	71	75	60	63	72	70	0.16	0.21	0.28	0.2	0.18	0.25	0.15	0.13	0.08	0.27	0.14	0.2	NA
chr7_74231857	18	16	22	27	12	14	16	23	11	24	25	19	0	0.06	0	0	0.08	0.07	0.06	0.04	0.09	0	0	0.05	RFC2
chr7_74231862	17	15	22	26	11	15	16	24	12	24	24	19	0	0	0	0.04	0	0.07	0	0	0	0.04	0	0.11	RFC2
chr7_74878127	87	64	57	77	53	48	75	80	61	62	72	75	0.1	0.05	0.11	0.13	0.08	0.17	0.05	0.06	0.07	0.08	0.1	0.11	NA
chr7_74878137	85	62	54	75	49	47	71	75	60	63	72	71	0.16	0.21	0.28	0.2	0.18	0.26	0.15	0.13	0.08	0.27	0.14	0.21	NA
chr7_74879233	29	32	31	55	32	42	35	33	42	32	37	43	0.03	0	0	0.09	0	0	0.09	0.03	0	0.16	0	0.05	NA
chr7_74879250	16	27	14	27	15	28	21	21	21	24	22	39	0.19	0.3	0.07	0.33	0.27	0.43	0.24	0.05	0.33	0.38	0.27	0.46	NA
chr7_74880741	34	49	64	37	26	34	49	33	39	50	48	43	0.03	0.06	0	0.03	0.08	0.06	0.02	0.09	0.08	0.04	0.1	0.07	NA
chr7_74880742	34	49	64	37	27	35	51	33	41	52	48	44	0.06	0.1	0.05	0.03	0.07	0.03	0.06	0.12	0.1	0.06	0.12	0.07	NA
chr7_74880861	34	25	11	30	20	24	31	49	29	21	35	23	0.06	0.08	0.09	0.07	0.2	0.08	0.19	0.04	0.07	0.1	0	0.13	NA
chr7_74881246	48	40	55	67	41	36	54	73	50	57	49	52	0.19	0.03	0.02	0.16	0.1	0.08	0.11	0.1	0.12	0.14	0.14	0.12	NA
chr7_74881249	49	41	59	68	42	37	60	72	55	62	50	53	0.14	0.05	0.02	0.22	0.02	0.14	0.1	0.04	0.04	0.03	0.14	0.08	NA
chr7_74881278	36	31	45	53	35	25	41	52	46	49	37	41	0.06	0.1	0.07	0.02	0.06	0.04	0.02	0.06	0.07	0.04	0.03	0.07	NA
chr7_74881286	44	22	28	40	27	28	34	45	33	25	30	33	0.14	0.05	0.04	0.25	0.07	0	0.03	0.04	0.03	0.12	0	0.03	NA
chr7_74881332	17	12	16	19	12	23	26	30	25	28	24	29	0	0	0.06	0.11	0.17	0	0	0.03	0	0	0.04	0	NA
chr7_75368512	44	21	23	35	26	25	33	36	31	23	29	33	0.14	0.05	0.04	0.31	0.08	0	0.03	0.03	0.03	0.09	0	0.03	NA
chr7_75368549	48	38	52	66	40	33	61	76	54	64	48	53	0.15	0.03	0.02	0.2	0.03	0.09	0.1	0.04	0.04	0.03	0.15	0.09	NA
chr7_75368552	47	37	50	65	39	32	55	77	49	59	47	53	0.19	0.03	0.04	0.14	0.1	0.09	0.11	0.09	0.12	0.14	0.15	0.13	NA
chr7_75368937	34	23	17	28	18	21	23	43	18	22	30	18	0.21	0.26	0.29	0.18	0.22	0.19	0.17	0.12	0.11	0.23	0.17	0.22	NA
chr7_75369056	37	53	68	42	32	35	49	31	42	54	50	45	0.14	0.17	0.1	0.12	0.19	0.09	0.06	0.13	0.1	0.09	0.14	0.09	NA
chr7_75369057	37	53	68	42	32	34	47	31	39	52	50	44	0.03	0.08	0	0.02	0.09	0.06	0	0.06	0.08	0.04	0.1	0.09	NA
chr7_75371650	39	30	22	40	28	26	36	44	33	32	31	34	0	0	0.09	0	0	0	0.03	0.07	0.06	0	0	0.06	NA
chr7_75371658	57	42	31	53	42	37	57	62	52	44	48	52	0.04	0	0.03	0.08	0.1	0.16	0.04	0.06	0.08	0.11	0.04	0.1	NA
chr7_75371668	63	47	34	62	49	41	66	70	55	47	48	60	0.02	0.06	0	0.08	0.08	0.22	0.06	0.03	0.02	0.04	0	0.05	NA
chr7_99574502	27	10	13	22	10	11	15	15	18	14	14	24	0	0	0	0	0	0	0	0	0	0	0.07	0.17	ZNF655
chr8_102829408	99	68	71	77	70	47	66	66	61	60	60	61	0	0.06	0.04	0.16	0.09	0.13	0.02	0.03	0	0.1	0.03	0.05	AZIN1
chr8_11843278	93	70	61	75	60	47	52	44	46	20	34	23	0.04	0.01	0.07	0.08	0.03	0.06	0.06	0.02	0.04	0.05	0.03	0.04	CTSB
chr8_11843765	26	23	18	38	21	24	11	14	10	16	16	19	0.08	0.04	0	0.18	0.14	0.04	0	0.07	0.2	0.12	0.12	0.16	CTSB
chr8_11843896	153	89	110	76	57	49	75	85	97	37	29	36	0.01	0.04	0.01	0.07	0.07	0.02	0.04	0.05	0.03	0.08	0.1	0.06	CTSB
chr8_11843920	133	87	119	72	49	51	76	80	89	37	29	38	0.41	0.41	0.43	0.74	0.73	0.53	0.41	0.44	0.43	0.68	0.45	0.79	CTSB
chr8_11843932	146	97	128	75	51	52	81	81	92	36	30	38	0.37	0.28	0.3	0.31	0.41	0.42	0.35	0.26	0.22	0.19	0.2	0.42	CTSB
chr8_11845033	128	77	90	161	79	100	103	76	76	60	78	82	0.15	0.18	0.1	0.11	0.11	0.09	0.13	0.12	0.05	0.15	0.13	0.13	CTSB
chr8_140516332	19	21	23	19	19	14	24	27	21	17	31	16	0.05	0	0	0.16	0.11	0	0	0	0	0	0	0	CHRAC1
chr8_30678436	31	34	47	19	15	23	33	18	42	24	28	33	0.1	0.06	0	0.26	0.27	0.22	0.09	0.06	0.07	0.29	0.11	0.18	GSR
chr8_30678618	56	22	41	36	18	18	29	54	43	36	35	34	0.02	0	0.02	0	0.06	0.11	0	0	0	0	0.06	0.12	GSR
chr8_30678626	57	27	41	40	24	19	31	57	43	43	40	35	0.02	0	0	0.03	0.08	0.16	0	0.04	0	0.02	0.03	0.06	GSR
chr8_30678629	54	26	36	40	22	17	34	57	44	40	36	30	0.06	0.08	0	0.12	0.23	0.12	0	0.09	0.07	0.03	0.11	0.17	GSR
chr8_30678634	39	22	29	38	20	16	31	49	32	36	32	24	0.21	0.23	0.1	0.58	0.7	0.31	0.1	0.2	0.22	0.36	0.38	0.5	GSR
chr8_30678635	38	23	30	38	20	17	31	49	32	36	33	24	0.16	0.13	0.03	0.47	0.7	0.24	0.03	0.16	0.09	0.25	0.24	0.25	GSR
chr8_38970533	16	12	25	22	22	18	12	13	14	17	16	20	0	0	0	0	0	0.17	0.17	0	0.07	0.06	0.06	0	PLEKHA2
chr8_38971826	28	32	16	37	19	14	22	42	33	13	19	20	0.04	0.03	0.06	0.22	0	0.21	0	0	0.15	0.15	0	0.05	PLEKHA2
chr8_38971832	31	35	18	46	22	15	24	47	34	16	23	21	0	0	0.11	0.11	0	0.13	0	0	0	0	0	0	PLEKHA2
chr8_47977549	69	45	65	67	26	43	45	45	43	24	31	28	0.28	0.2	0.38	0.64	0.69	0.7	0.36	0.36	0.28	0.62	0.74	0.75	MCM4
chr8_47977554	70	44	64	68	26	42	43	44	42	24	31	28	0.07	0.09	0.05	0.26	0.46	0.24	0	0.05	0.02	0.21	0.29	0.29	MCM4
chr8_47977712	42	30	18	23	18	20	20	12	14	10	16	11	0	0.03	0	0	0	0	0	0	0	0.2	0.12	0	MCM4
chr8_47977733	49	33	35	34	28	18	24	20	18	15	19	25	0.02	0	0	0.03	0	0.06	0	0	0	0	0.16	0	MCM4
chr8_97726959	42	23	24	23	23	34	22	29	12	22	26	22	0.02	0	0	0	0.09	0.06	0.05	0.03	0	0	0	0	MTDH
chr8_97727380	64	52	34	46	27	30	56	67	41	38	45	41	0.06	0.02	0.06	0.02	0	0	0.07	0.04	0	0.05	0.04	0.1	MTDH
chr8_97728666	75	38	50	46	15	25	35	56	45	28	25	25	0.08	0.08	0.06	0.11	0.13	0.2	0.03	0.04	0.04	0.07	0.04	0.12	MTDH
chr8_97728667	75	38	51	46	16	25	34	55	46	28	25	24	0.15	0.05	0.12	0.28	0.25	0.32	0.15	0.16	0.15	0.18	0.32	0.12	MTDH
chr8_97728672	75	36	51	46	16	25	35	56	47	28	25	24	0.12	0.11	0.1	0.3	0.38	0.32	0.14	0.13	0.19	0.25	0.12	0.25	MTDH
chr9_113292066	27	10	12	25	17	20	19	23	17	23	25	29	0.07	0.1	0	0.04	0.06	0.1	0	0	0.06	0.04	0.12	0	PRPF4
chr9_128190753	38	37	50	53	34	47	44	35	38	22	31	26	0	0.03	0.02	0.04	0.06	0.04	0.05	0	0	0.05	0.06	0.04	CIZ1
chr9_128309300	22	18	15	25	15	13	12	29	23	15	20	32	0.05	0.06	0	0.16	0.07	0.08	0.08	0	0	0	0.05	0	TRUB2
chr9_129503328	26	15	25	25	18	15	22	26	28	28	25	25	0.15	0	0	0.04	0	0	0	0.04	0.04	0	0.04	0	LINC00963
chr9_132690448	22	25	16	23	22	21	17	24	24	22	32	27	0.14	0	0.06	0	0.09	0.05	0.29	0.04	0.12	0.05	0	0.04	NA
chr9_133362696	22	58	40	23	47	46	58	21	42	25	31	26	0	0.03	0	0.13	0.06	0.07	0.09	0	0	0.04	0.1	0.08	SURF4
chr9_136441103	38	24	27	29	16	26	35	30	26	18	28	23	0.03	0.08	0.04	0	0	0	0.03	0	0	0.11	0.07	0.04	SEC16A
chr9_136441145	18	19	17	29	21	17	37	28	15	15	23	18	0	0	0	0.17	0.43	0.12	0.03	0.07	0.13	0.13	0.3	0.28	SEC16A
chr9_136441430	35	31	31	38	18	27	41	50	28	35	39	36	0.03	0.03	0.13	0.42	0.33	0.44	0.12	0.14	0.04	0.34	0.23	0.25	SEC16A
chr9_14710	12	10	14	19	14	14	12	21	11	15	20	19	0.42	0.6	0.57	0.26	0.43	0.71	0.83	0.33	0.45	0.2	0.68	0.72	WASH1
chr9_37503370	42	15	19	26	18	23	24	40	22	17	26	36	0.05	0	0.05	0.12	0.06	0.04	0	0.03	0.09	0	0.04	0.03	POLR1E
chr9_37503395	47	14	19	29	21	22	29	33	26	13	28	30	0.21	0.14	0.21	0.14	0.14	0.14	0.07	0.09	0.15	0.23	0.21	0.2	POLR1E
chr9_71865609	19	21	23	38	23	13	16	22	28	20	21	24	0	0	0	0.05	0	0.15	0	0	0	0	0	0.04	ABHD17B
chrX_150767751	52	25	32	42	21	27	40	40	24	31	31	27	0.1	0	0.09	0.17	0.05	0.19	0.07	0.05	0	0.03	0.1	0.19	CD99L2
chrX_150767753	50	24	31	41	21	26	39	37	24	30	31	27	0.02	0	0.06	0.12	0.43	0.15	0.08	0.14	0	0.2	0.13	0.07	CD99L2
chrX_24077299	20	19	22	35	20	30	26	26	40	23	18	52	0	0	0	0.03	0.15	0	0	0	0	0.04	0	0	EIF2S3
chrX_54563746	25	18	15	17	11	11	20	49	38	10	11	13	0	0	0.07	0	0	0.18	0.05	0	0	0	0.09	0.08	GNL3L
chrX_77827691	37	28	31	33	25	34	15	20	18	17	22	19	0.03	0	0	0.06	0	0.09	0	0	0.06	0	0	0	MAGT1
chrX_77828108	54	36	51	16	14	25	21	21	15	13	22	17	0	0	0	0.06	0	0.12	0	0	0	0.15	0	0	MAGT1
